# Supplementary material
Source: PubMed Central journal article supplement (PMC6940593)

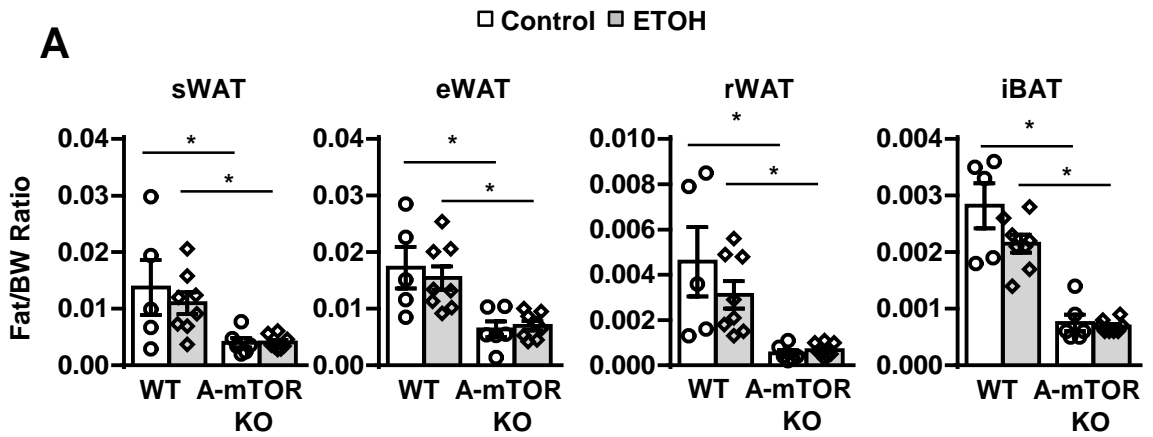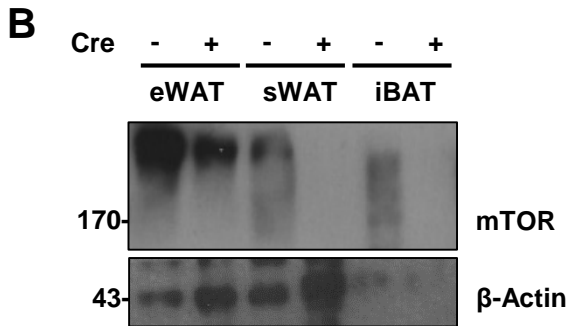

Supplement: mmc1.pdf [file mmc1.pdf]

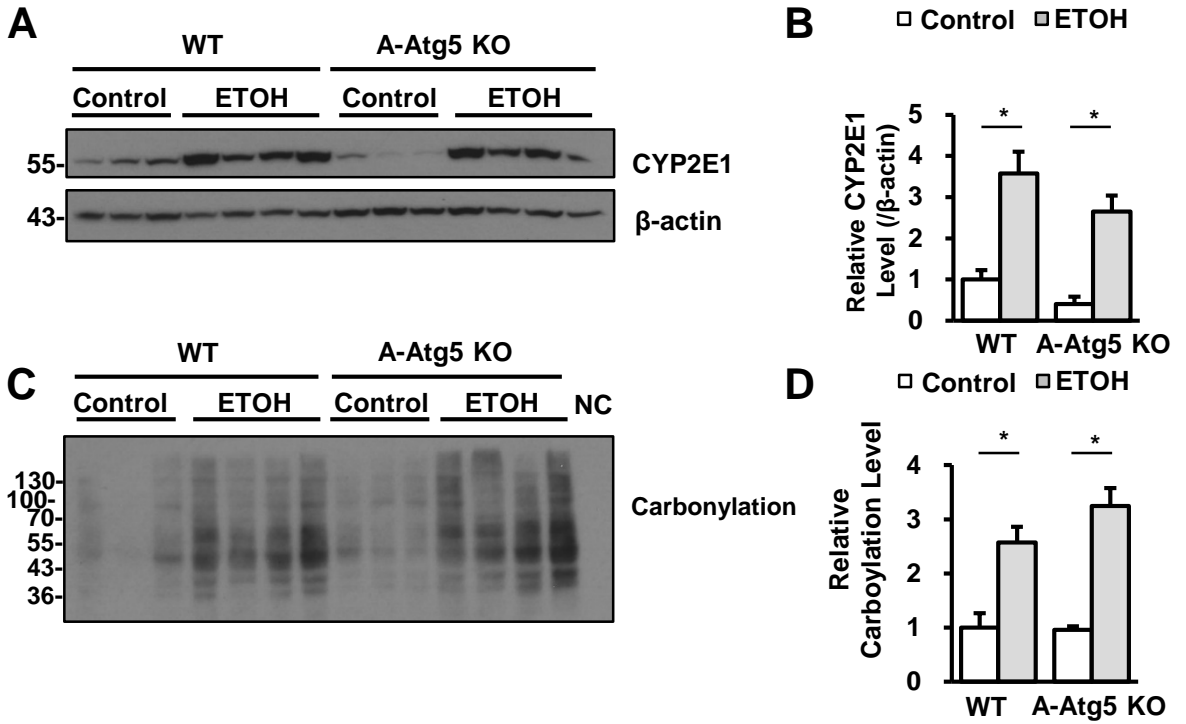

Supplement: mmc10.pdf [file mmc10.pdf]

# Supplemental Figure 11

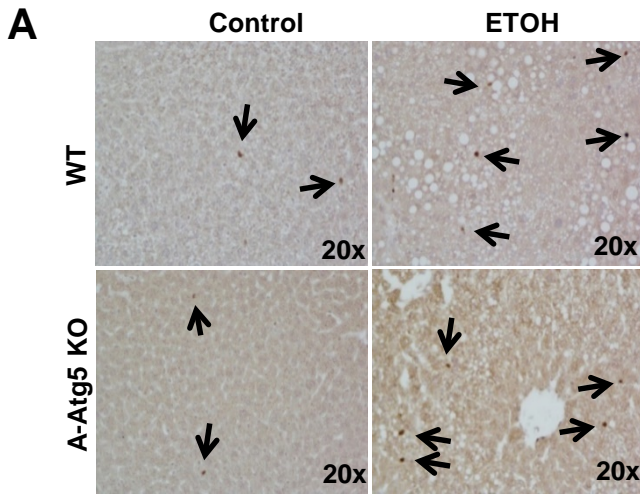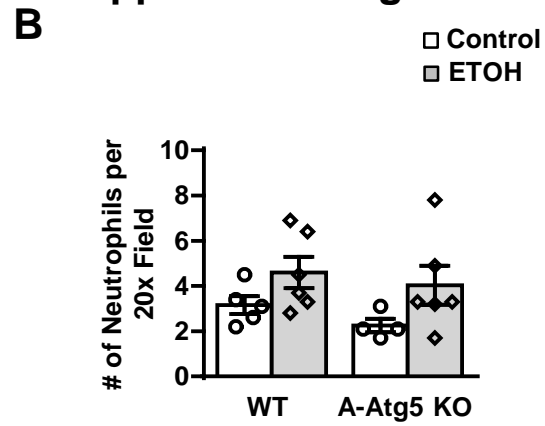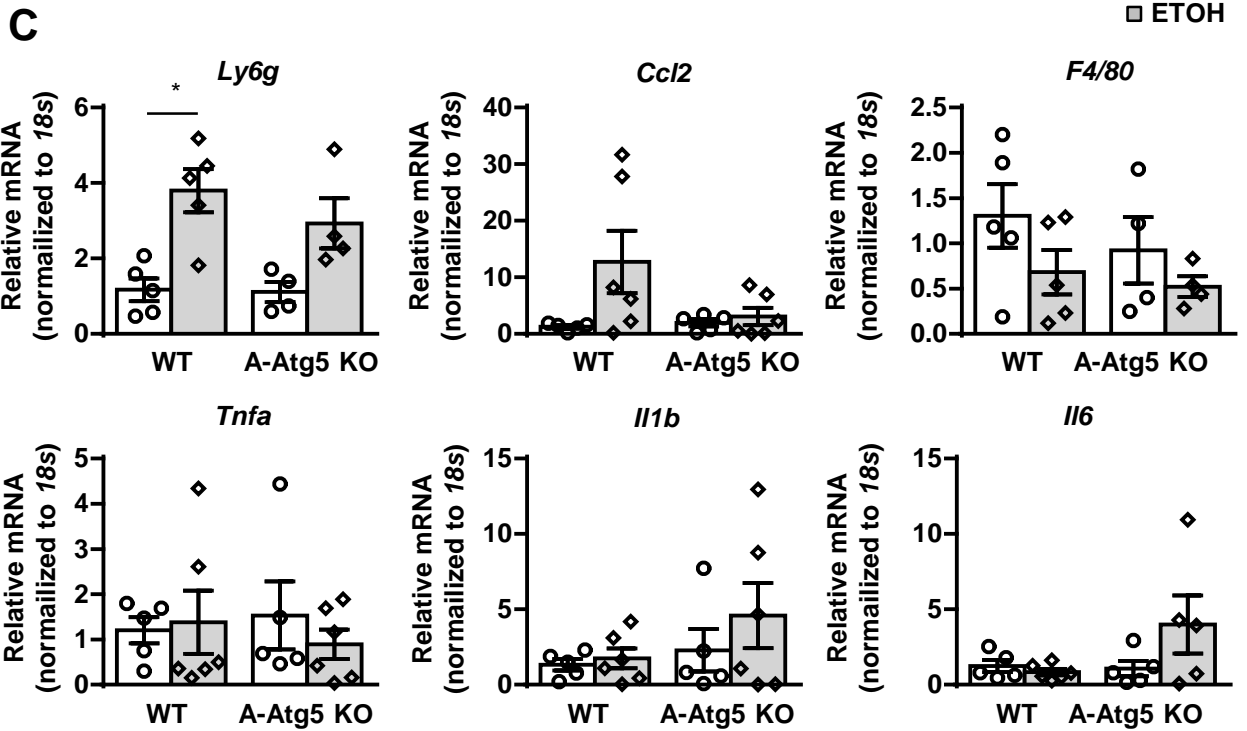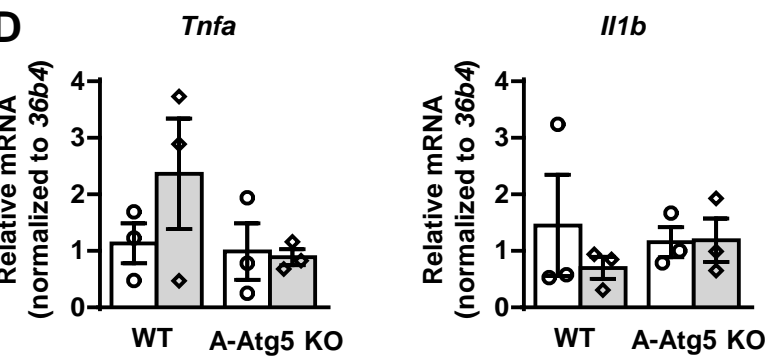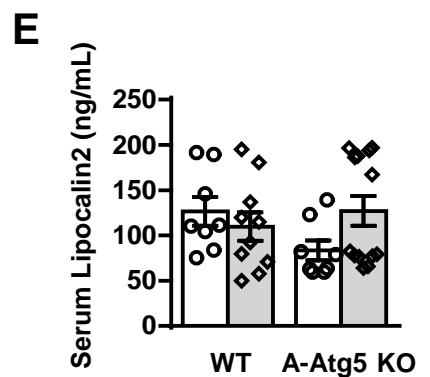

Supplement: mmc11.pdf [file mmc11.pdf]

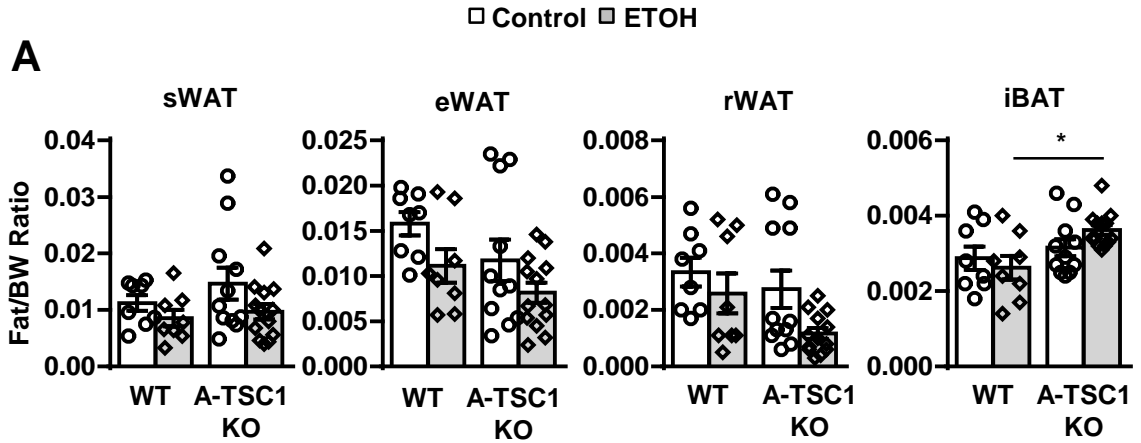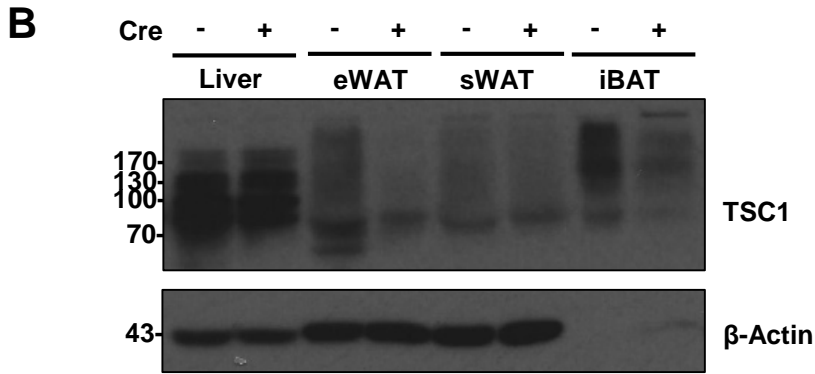

Supplement: mmc2.pdf [file mmc2.pdf]

# Supplemental Figure 3

**A**

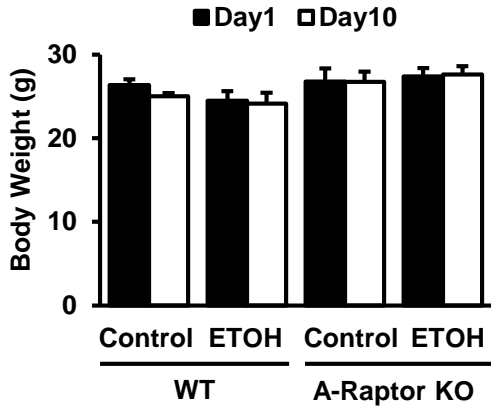

**B**

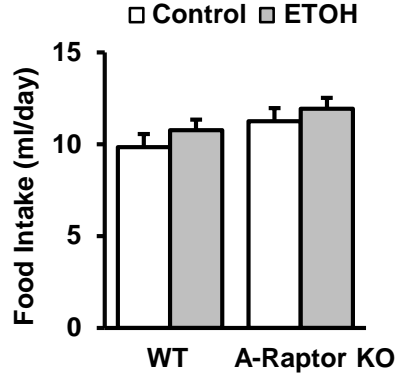

Supplement: mmc3.pdf [file mmc3.pdf]

**A**

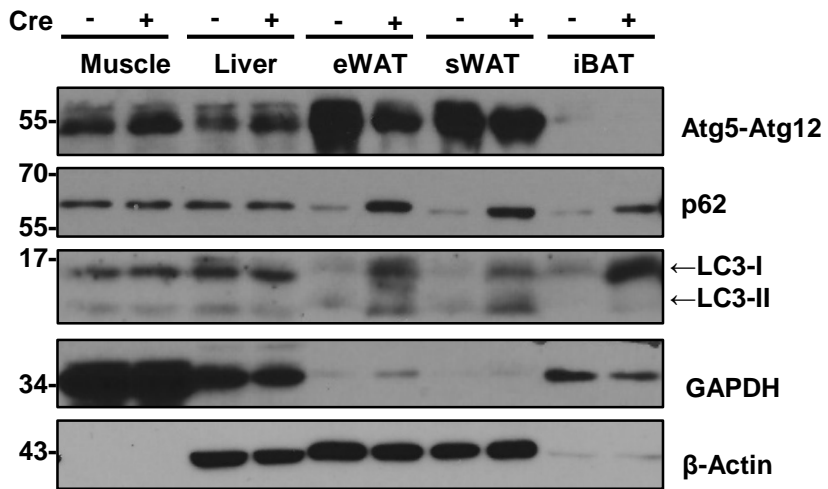

**B**

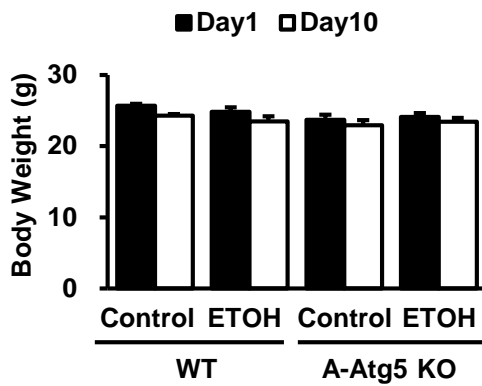

**C**

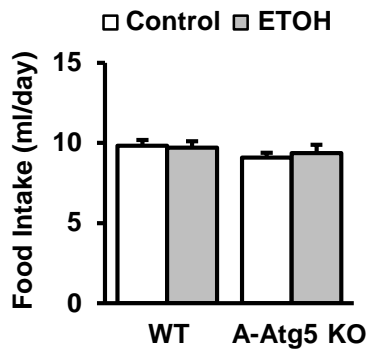

Supplement: mmc7.pdf [file mmc7.pdf]

**A**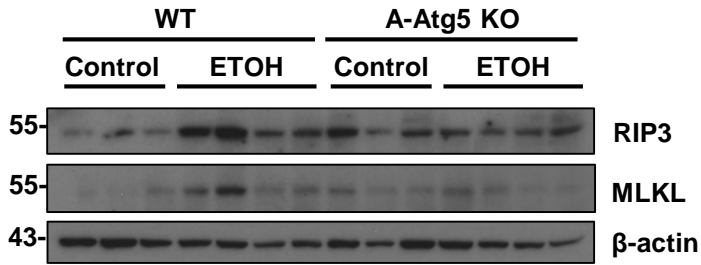**B**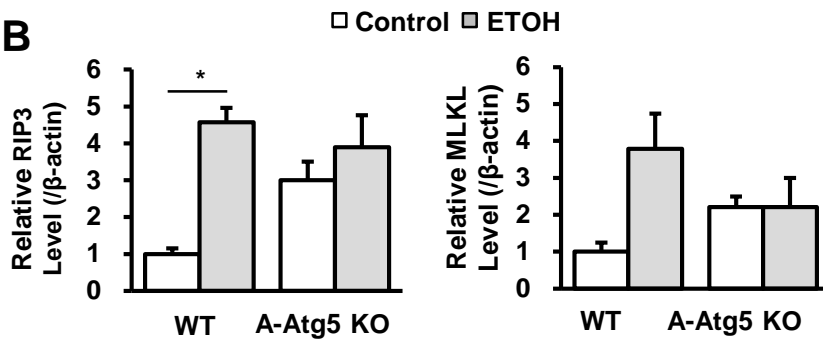

Supplement: mmc9.pdf [file mmc9.pdf]
